# Supplementary material for: Structural evolution and electronic properties of neutral and anionic TiASil (A = Sc, Ti; l ≤ 12): relatively stable TiASi4 as a structural unit
Source: Royal Society of Chemistry journal article supplement (doi:10.1039/d2cp04925b), 2022-12-08
Supplement: d2cp04925b1.pdf [file d2cp04925b1.pdf]

## Supplementary Information

### Relatively stable, square bipyramidal structure of $Ti_2Si_4$ : structural probe and electronic properties of neutral and anionic $TiASi_l$ ( $A = Sc, Ti; l \leq 12$ )

Qing-Hua Lu<sup>a</sup>, Jun Lu<sup>a\*</sup>, Xiao-Jun Li<sup>b</sup>

<sup>a</sup>School of Life Science and Technology, Inner Mongolia University of Science and Technology, Baotou 014010, P.R. China

<sup>b</sup>School of Science, Xi'an University of Posts and Telecommunications, Xi'an 710121, Shaanxi, P. R. China

\*Corresponding Author, E-mail: [lujun2910@imust.edu.cn](mailto:lujun2910@imust.edu.cn)

### Table of Contents

Table S1 The PES position of electron binding energy GMS of anionic  $TiASi_l$  ( $A = Sc$  and  $Ti; l \leq 12$ ) clusters.

Figure S1 Part of isomers of  $TiScSi_l$  clusters.

Figure S2 Part of isomers of  $Ti_2Si_l$  clusters.

Table S1 The PES position of electron binding energy GMS of anionic  $\text{TiASi}_i$  ( $A = \text{Sc and Ti}; i \leq 12$ ) clusters.

| Clusters                      | The position of electron binding energy |      |      |      |      |      |      |      |
|-------------------------------|-----------------------------------------|------|------|------|------|------|------|------|
|                               | A                                       | B    | C    | D    | E    | F    | G    | H    |
| $\text{TiScSi}^-$             | 1.48                                    | 2.03 | 2.62 |      |      |      |      |      |
| $\text{TiScSi}_2^-$           | 1.51                                    | 1.78 | 2.7  | 3.02 |      |      |      |      |
| $\text{TiScSi}_3^-$           | 1.93                                    | 2.15 | 2.54 | 3.15 | 3.43 | 3.7  |      |      |
| $\text{TiScSi}_4^-$           | 2.17                                    | 2.51 | 3.15 | 3.34 | 3.61 | 3.91 |      |      |
| $\text{TiScSi}_5^-$           | 2.06                                    | 2.23 | 2.51 | 2.99 | 3.17 | 3.61 | 4.09 | 4.32 |
| $\text{TiScSi}_6^-$           | 2.45                                    | 2.71 | 2.99 | 3.49 | 3.9  |      |      |      |
| $\text{TiScSi}_7^-$           | 2.84                                    | 3.46 | 3.76 | 4.09 |      |      |      |      |
| $\text{TiScSi}_8^-$           | 2.7                                     | 3.24 | 3.67 | 4.14 | 4.43 |      |      |      |
| $\text{TiScSi}_9^-$           | 3.39                                    | 3.6  | 4.25 |      |      |      |      |      |
| $\text{TiScSi}_{10}^-$        | 3.31                                    | 3.87 | 4.06 |      |      |      |      |      |
| $\text{TiScSi}_{11}^-$        | 2.86                                    | 3.08 | 3.39 | 3.79 | 4.11 | 4.44 |      |      |
| $\text{TiScSi}_{12}^-$        | 3.00                                    | 3.73 | 4.14 |      |      |      |      |      |
| $\text{Ti}_2\text{Si}^-$      | 1.52                                    | 1.92 | 2.16 | 2.63 |      |      |      |      |
| $\text{Ti}_2\text{Si}_2^-$    | 1.48                                    | 1.85 | 2.25 | 3.06 |      |      |      |      |
| $\text{Ti}_2\text{Si}_3^-$    | 2.58                                    | 2.79 | 3.32 | 3.83 | 4.08 | 4.45 |      |      |
| $\text{Ti}_2\text{Si}_4^-$    | 2.02                                    | 2.43 | 2.9  | 3.45 | 3.81 | 4.14 |      |      |
| $\text{Ti}_2\text{Si}_5^-$    | 2.8                                     | 3.11 | 3.76 | 4.07 | 4.39 |      |      |      |
| $\text{Ti}_2\text{Si}_6^-$    | 2.31                                    | 2.68 | 3.08 | 3.45 | 4    |      |      |      |
| $\text{Ti}_2\text{Si}_7^-$    | 2.74                                    | 3.11 | 3.31 | 4.36 |      |      |      |      |
| $\text{Ti}_2\text{Si}_8^-$    | 3.2                                     | 3.81 | 4.19 | 4.36 |      |      |      |      |
| $\text{Ti}_2\text{Si}_9^-$    | 3.36                                    | 3.89 | 4.35 |      |      |      |      |      |
| $\text{Ti}_2\text{Si}_{10}^-$ | 3.31                                    | 3.7  | 4.19 | 4.44 |      |      |      |      |
| $\text{Ti}_2\text{Si}_{11}^-$ | 3.5                                     | 3.84 | 4.27 |      |      |      |      |      |
| $\text{Ti}_2\text{Si}_{12}^-$ | 3.62                                    | 4.12 | 4.37 |      |      |      |      |      |

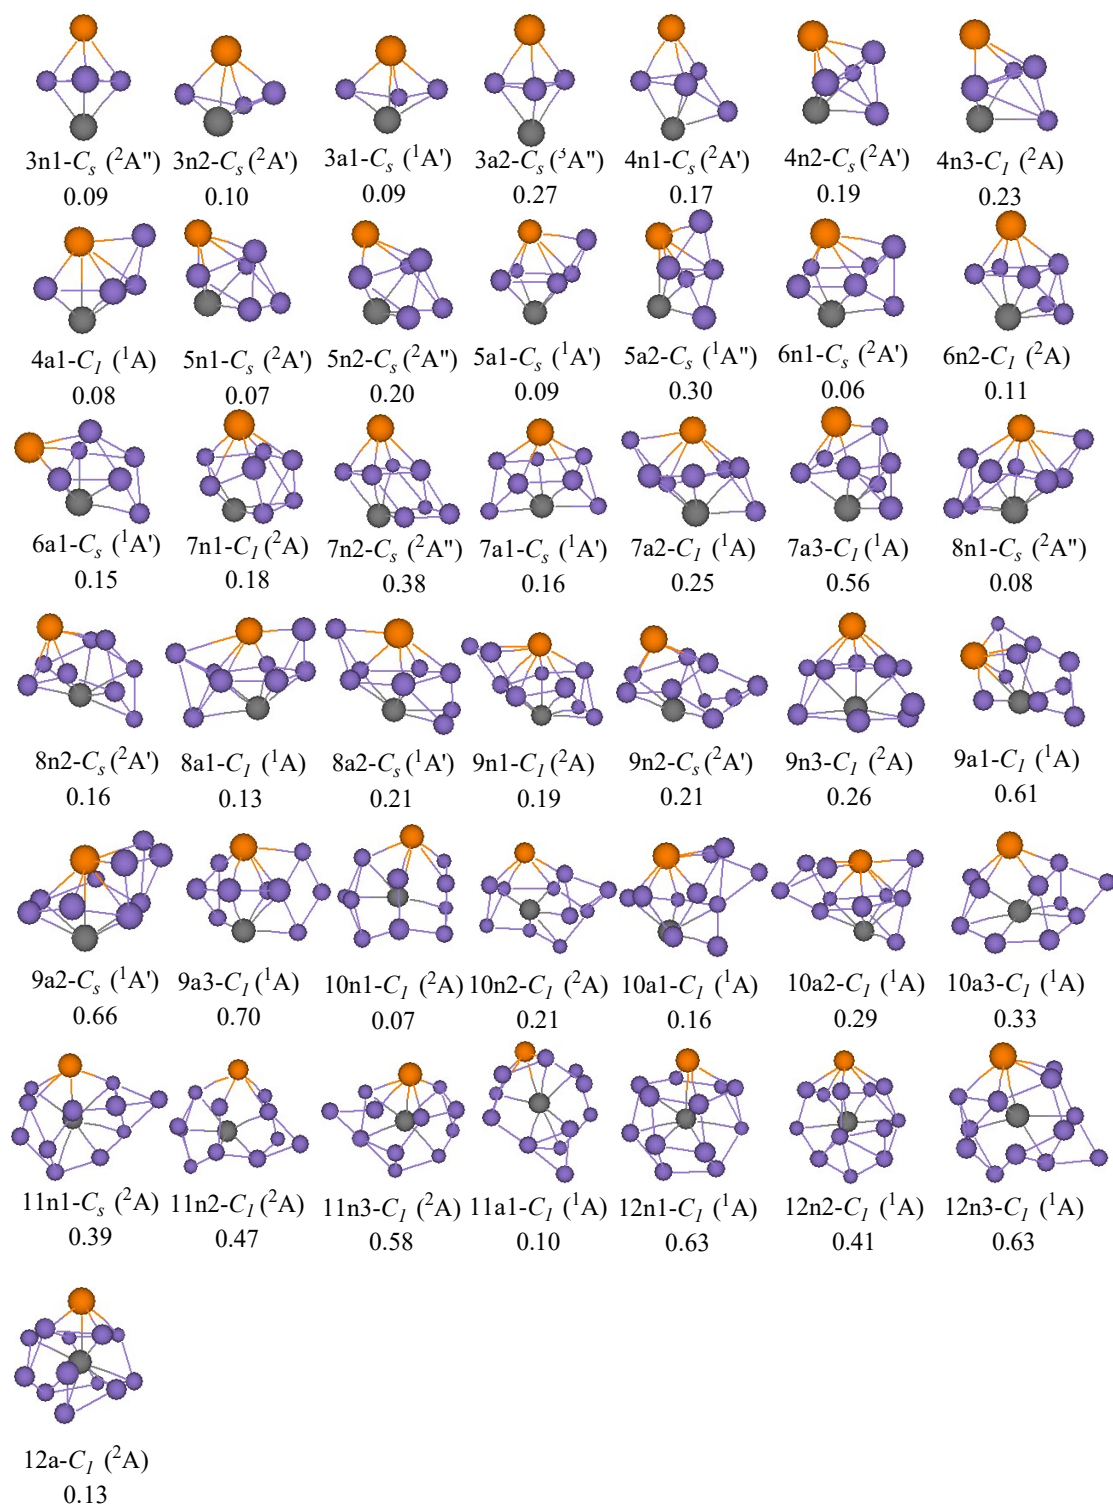

Figure S1 Part of isomers of TiScSi<sub>l</sub> clusters. The first value stands for l, n and a stand for neutral and anion. The orange balls are scandium, purple ball are silicon atoms, and the gray balls on the bottom are titanium atoms. The symmetry, electronic state (in parentheses) and relative energy are given below the structure for each size.

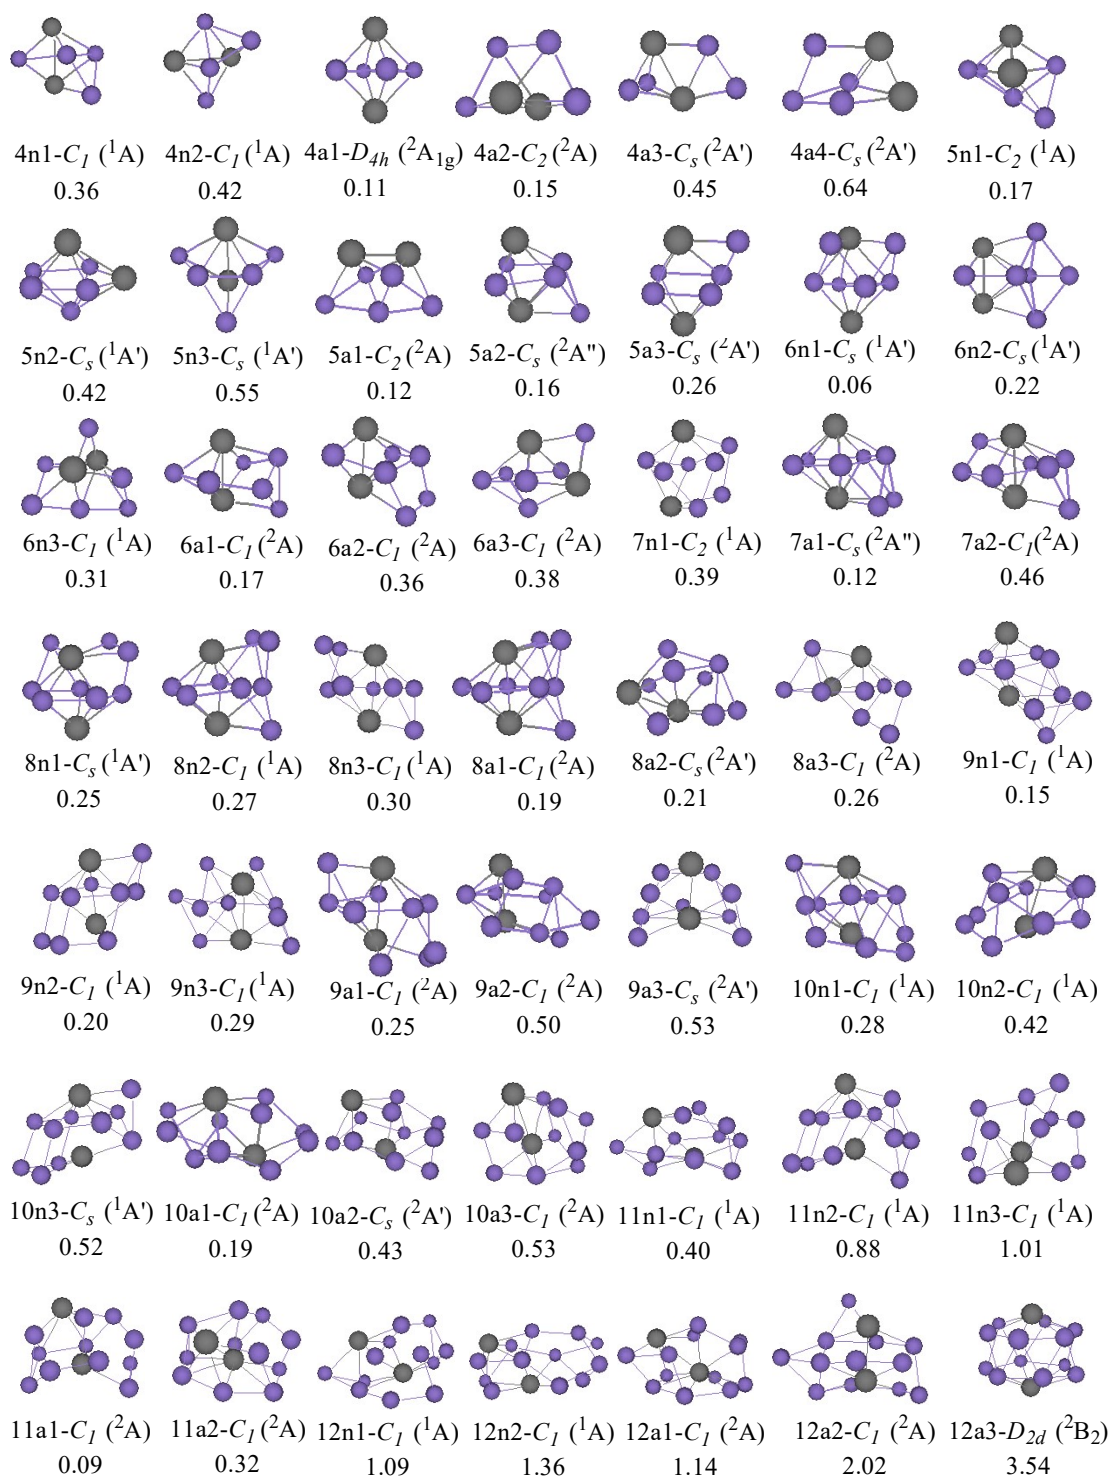

Figure S2 Part of isomers of  $Ti_2Si_l$  clusters. The first value stands for  $l$ ,  $n$  and a stand for neutral and anion. The upper gray balls are titanium atoms, purple ball are silicon atoms. The symmetry, electronic state (in parentheses) and relative energy are given below the structure for each size.
